# Supplementary material for: Platelets subvert antitumor efficacy of T cell-recruiting bispecific antibodies
Source: PubMed Central journal article supplement — J Immunother Cancer. 2022 Feb 2;10(2):e003655. doi: 10.1136/jitc-2021-003655 (PMC8811601; doi:10.1136/jitc-2021-003655), 2022-02-02
Supplement: jitc-2021-003655supp001.pdf [file jitc-2021-003655supp001.pdf]

## Supplemental Figures

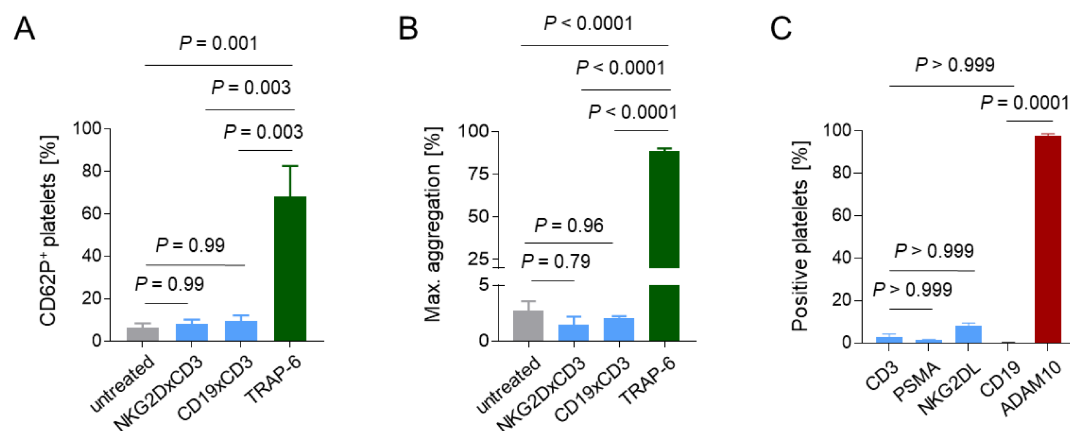

**Supplemental Figure 1: A-B** Induction of **A** platelet activation and **B** aggregation upon NKG2DxCD3 and Blinatumomab (CD19xCD3) treatment. 10  $\mu$ M TRAP-6 served as a positive control. Statistical significance was calculated by one-way ANOVA and Tukey's multiple comparisons test. **C** Platelet surface expression of target antigens used for the bispecific constructs (CD3, PSMA, NKG2DL and CD19); ADAM10 served as a positive control (n=4). Statistical significance was calculated by Kruskal-Wallis test and Dunn's multiple comparisons test.

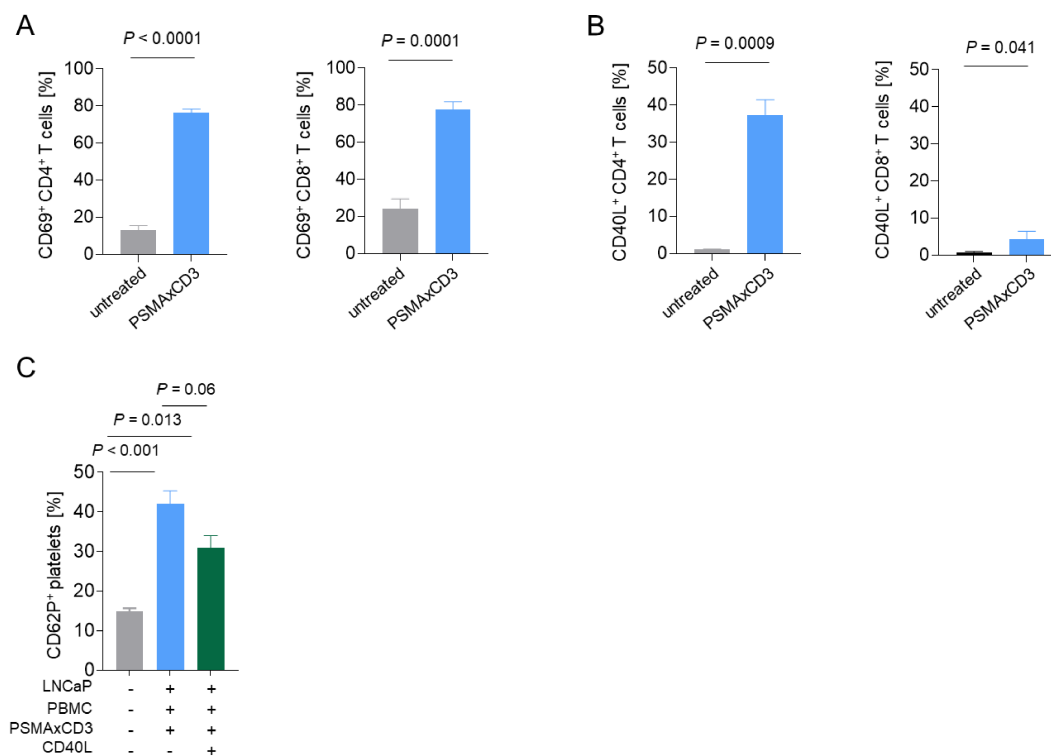

**Supplemental Figure 2: A-B** Induction of **A** CD69 expression and **B** CD40L expression upon PSMAxCD3 treatment. PBMCs of healthy donors were incubated with LNCaP cells (E:T 4:1 in the presence or absence of PSMAxCD3 (200 ng/ml). Statistical significance was calculated by students two-tailed t-test. **C** Platelets of healthy donors (n=3) were analyzed for CD62P expression after culturing them for 2 h in the presence or absence of LNCaP cells in the combination with PSMAxCD3 and PBMCs of healthy donors with or without a CD40L blocking antibody (10 µg/ml). Statistical significance was calculated by one-way ANOVA and Tukey's multiple comparisons test.

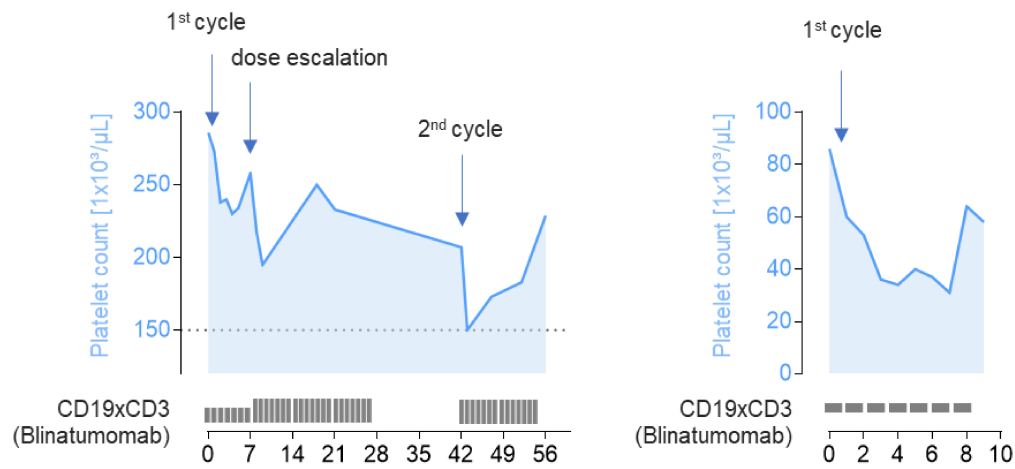

**Supplemental Figure 3:** Correlation of platelet count and treatment with Blinatumomab (CD19xCD3) in two B-ALL patients.
